# Supplementary material
Source: PubMed Central journal article supplement (PMC6108177)

# Uncropped blot of Figure 2a

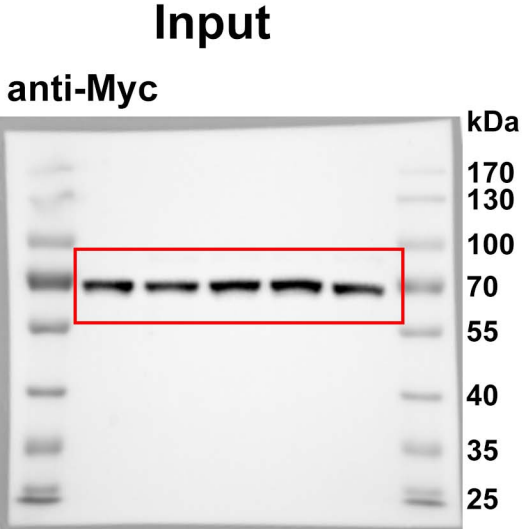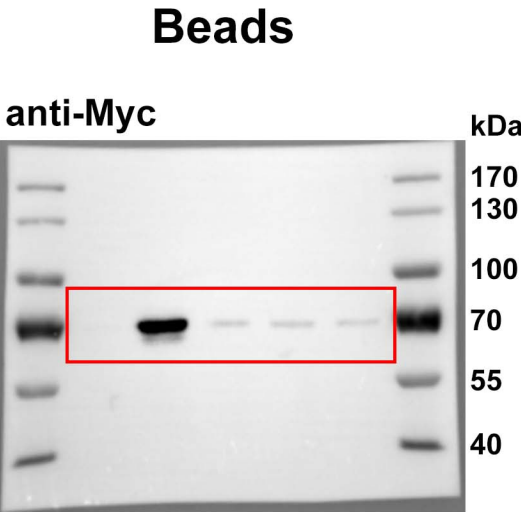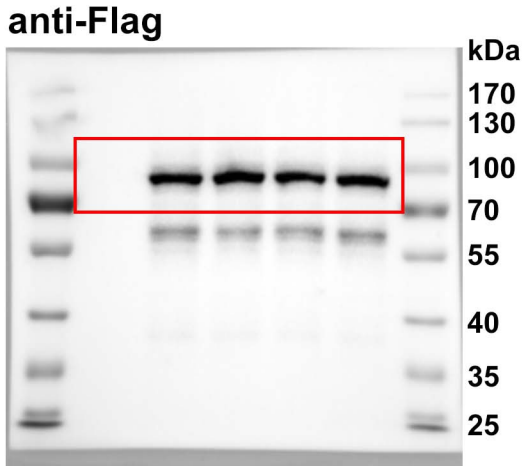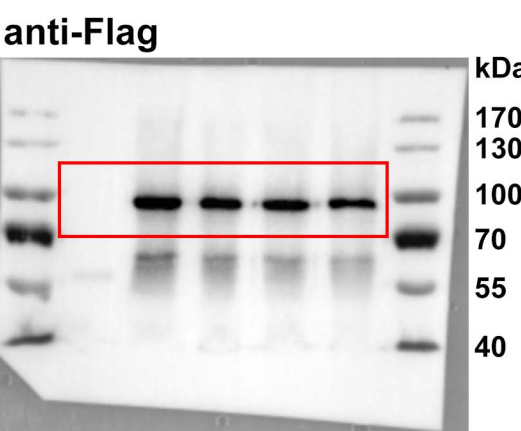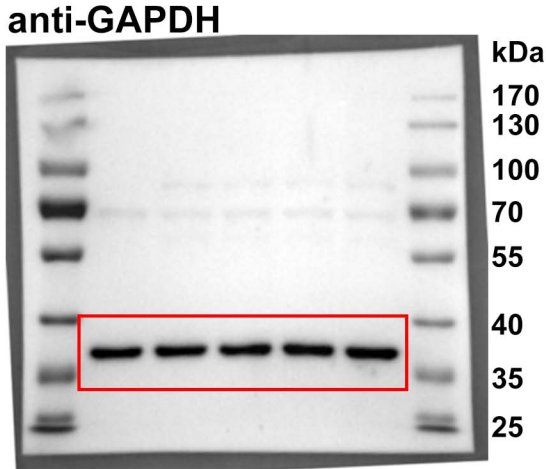

# Uncropped blot of Supplementary Figure 5d

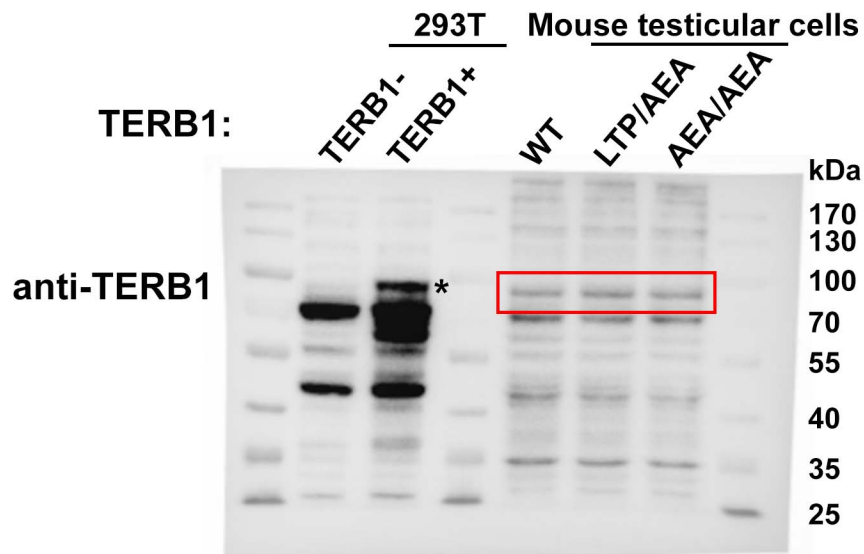

\* Indicates the TERB1 bands

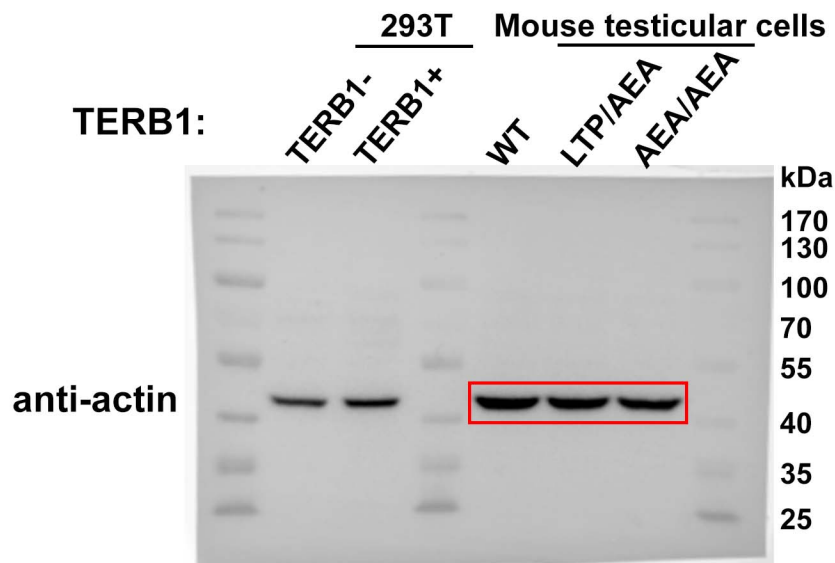

# Uncropped blot of Supplementary Figure 8a

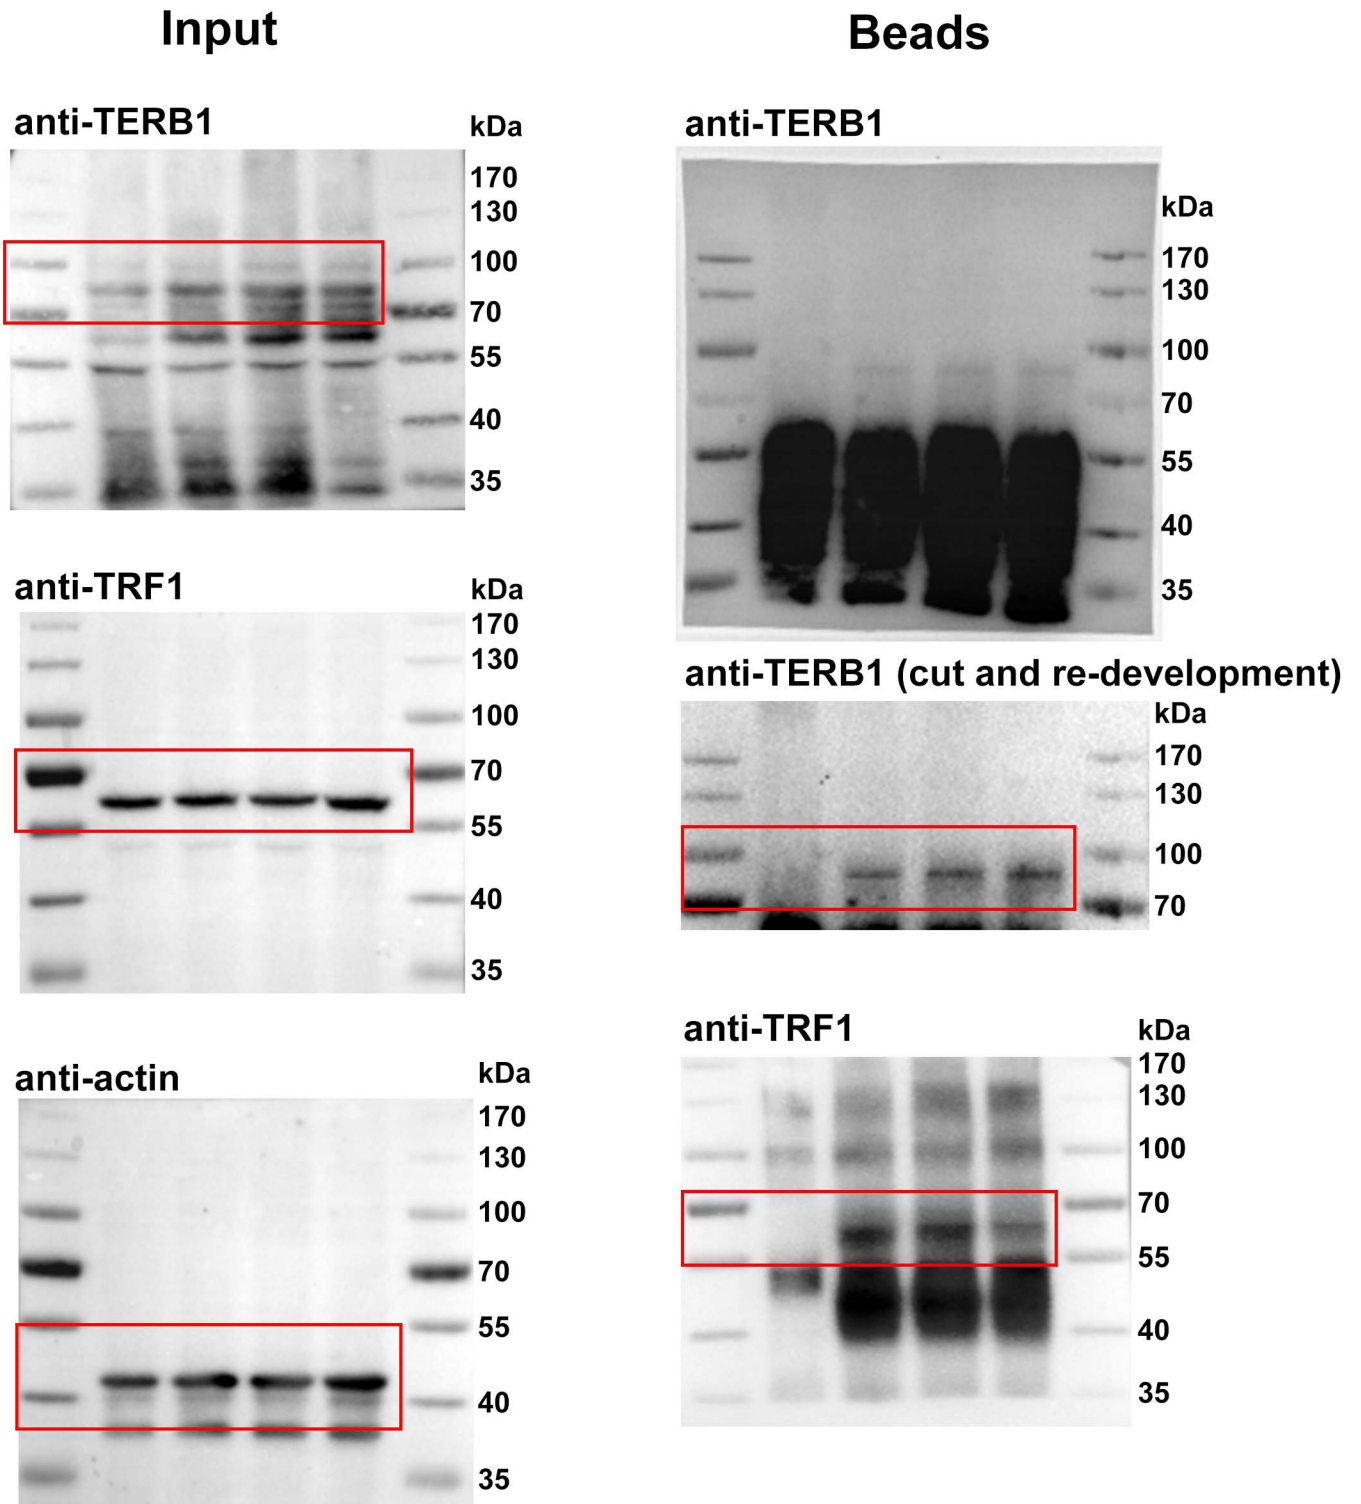

# Representative gating strategy for the FACS analysis

## PI-stained fixed testicular cells

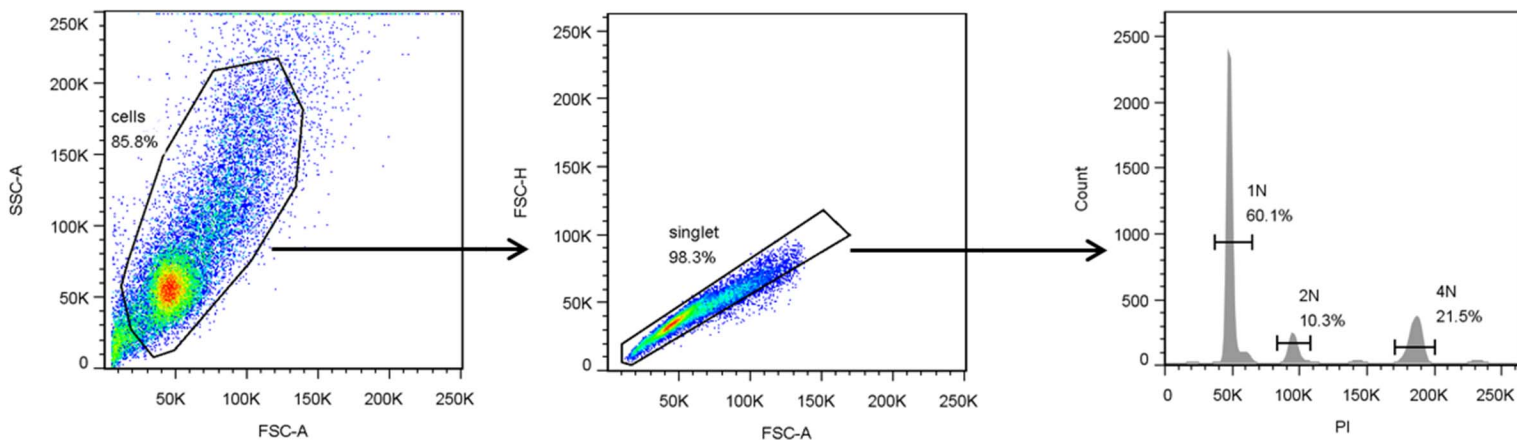

## Hoechst-stained live testicular cells

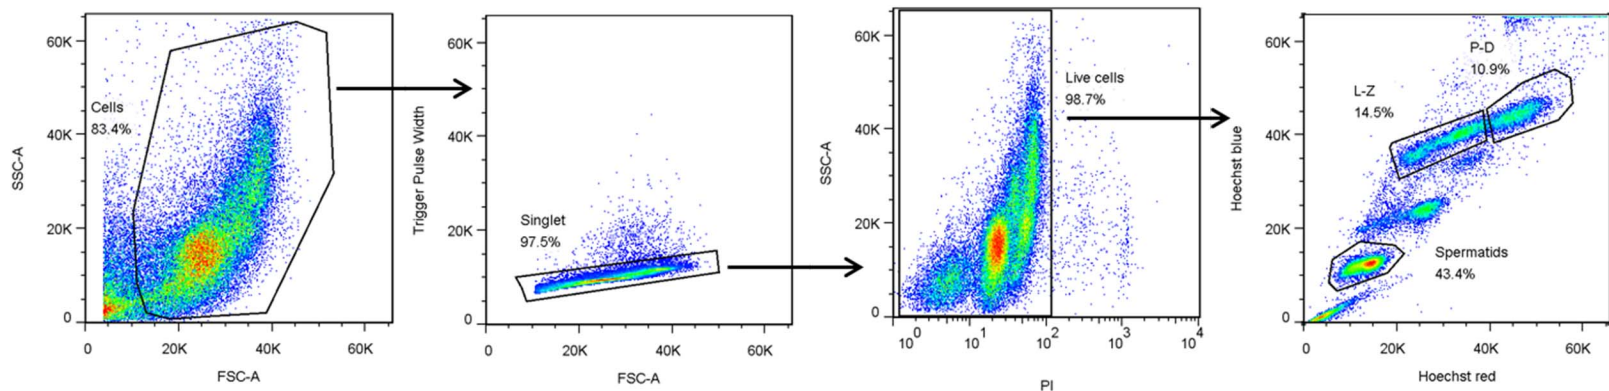

Supplement: NIHMS984957-supplement-Supplementary_Dataset.pdf [file NIHMS984957-supplement-Supplementary_Dataset.pdf]
